# Supplementary figures and images for: Genetic characterization of a new candidate hemagglutinin subtype of influenza A viruses
Source: PubMed Central journal article supplement — Emerg Microbes Infect. 2023 Jun 27;12(2):2225645. doi: 10.1080/22221751.2023.2225645 (PMC10308872; doi:10.1080/22221751.2023.2225645), 2023-06-27

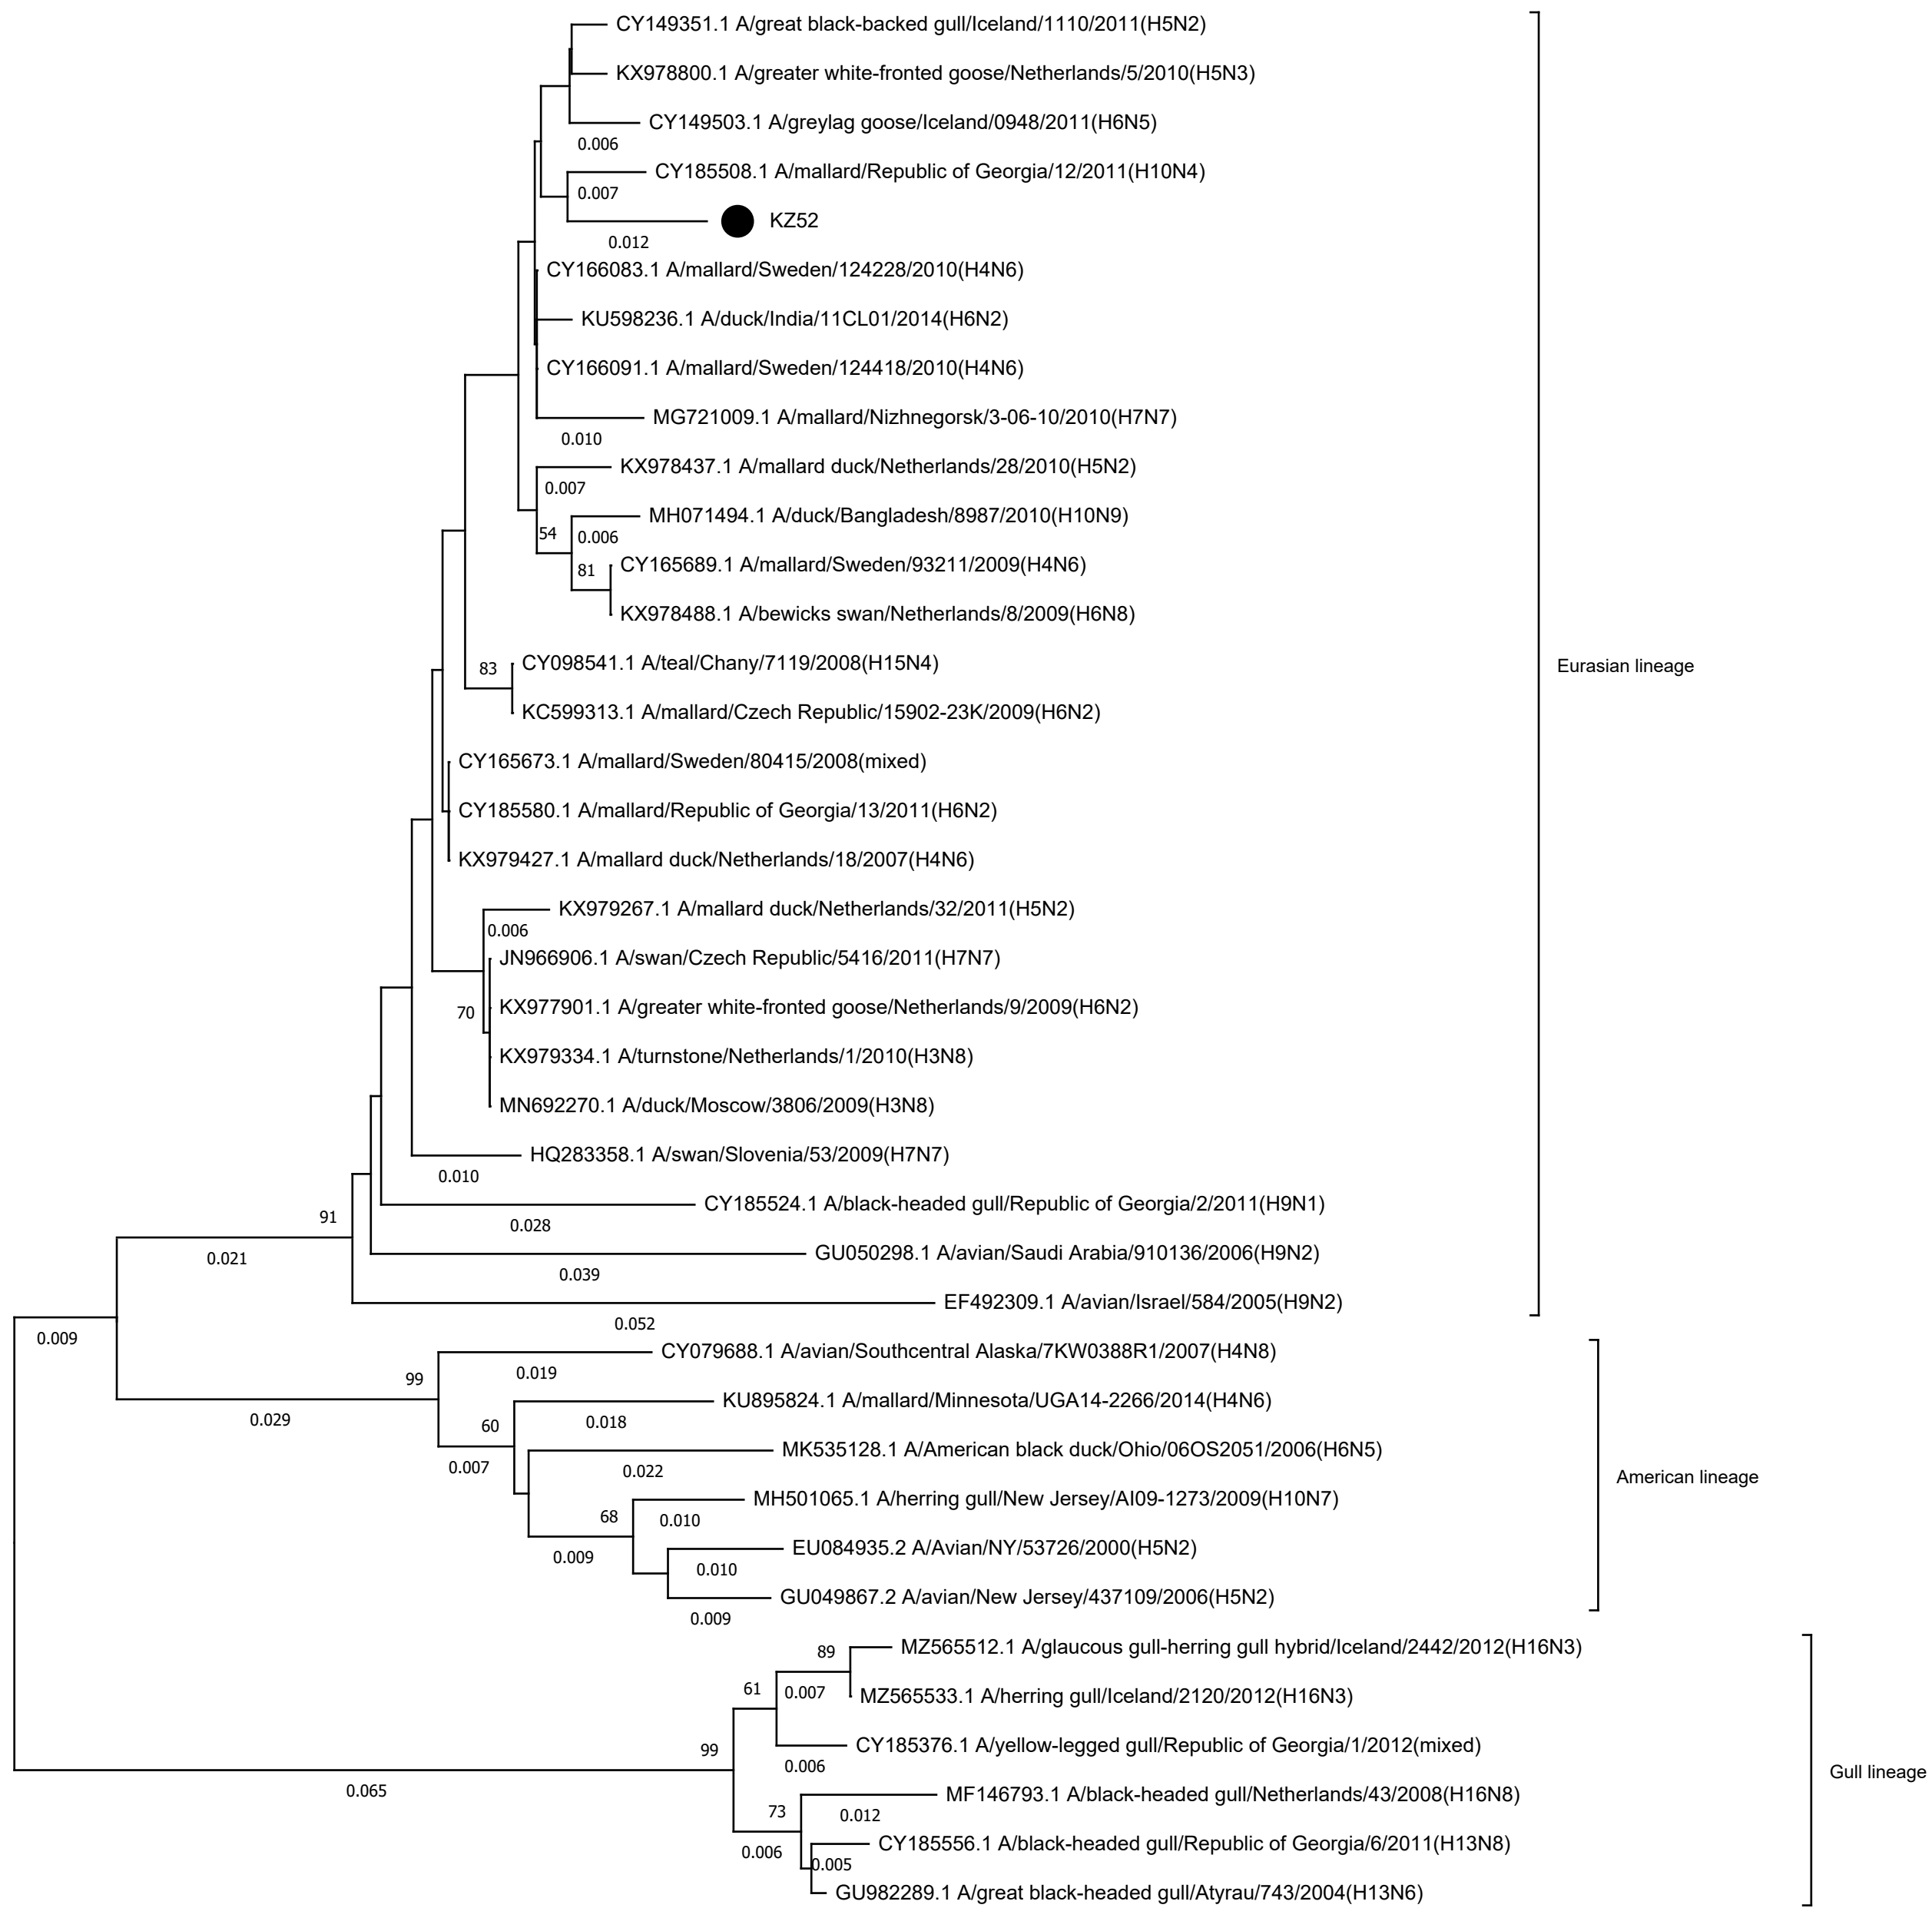

0.02

Supplement: TEMI_A_2225645_SM8147.pdf [file TEMI_A_2225645_SM8147.pdf]

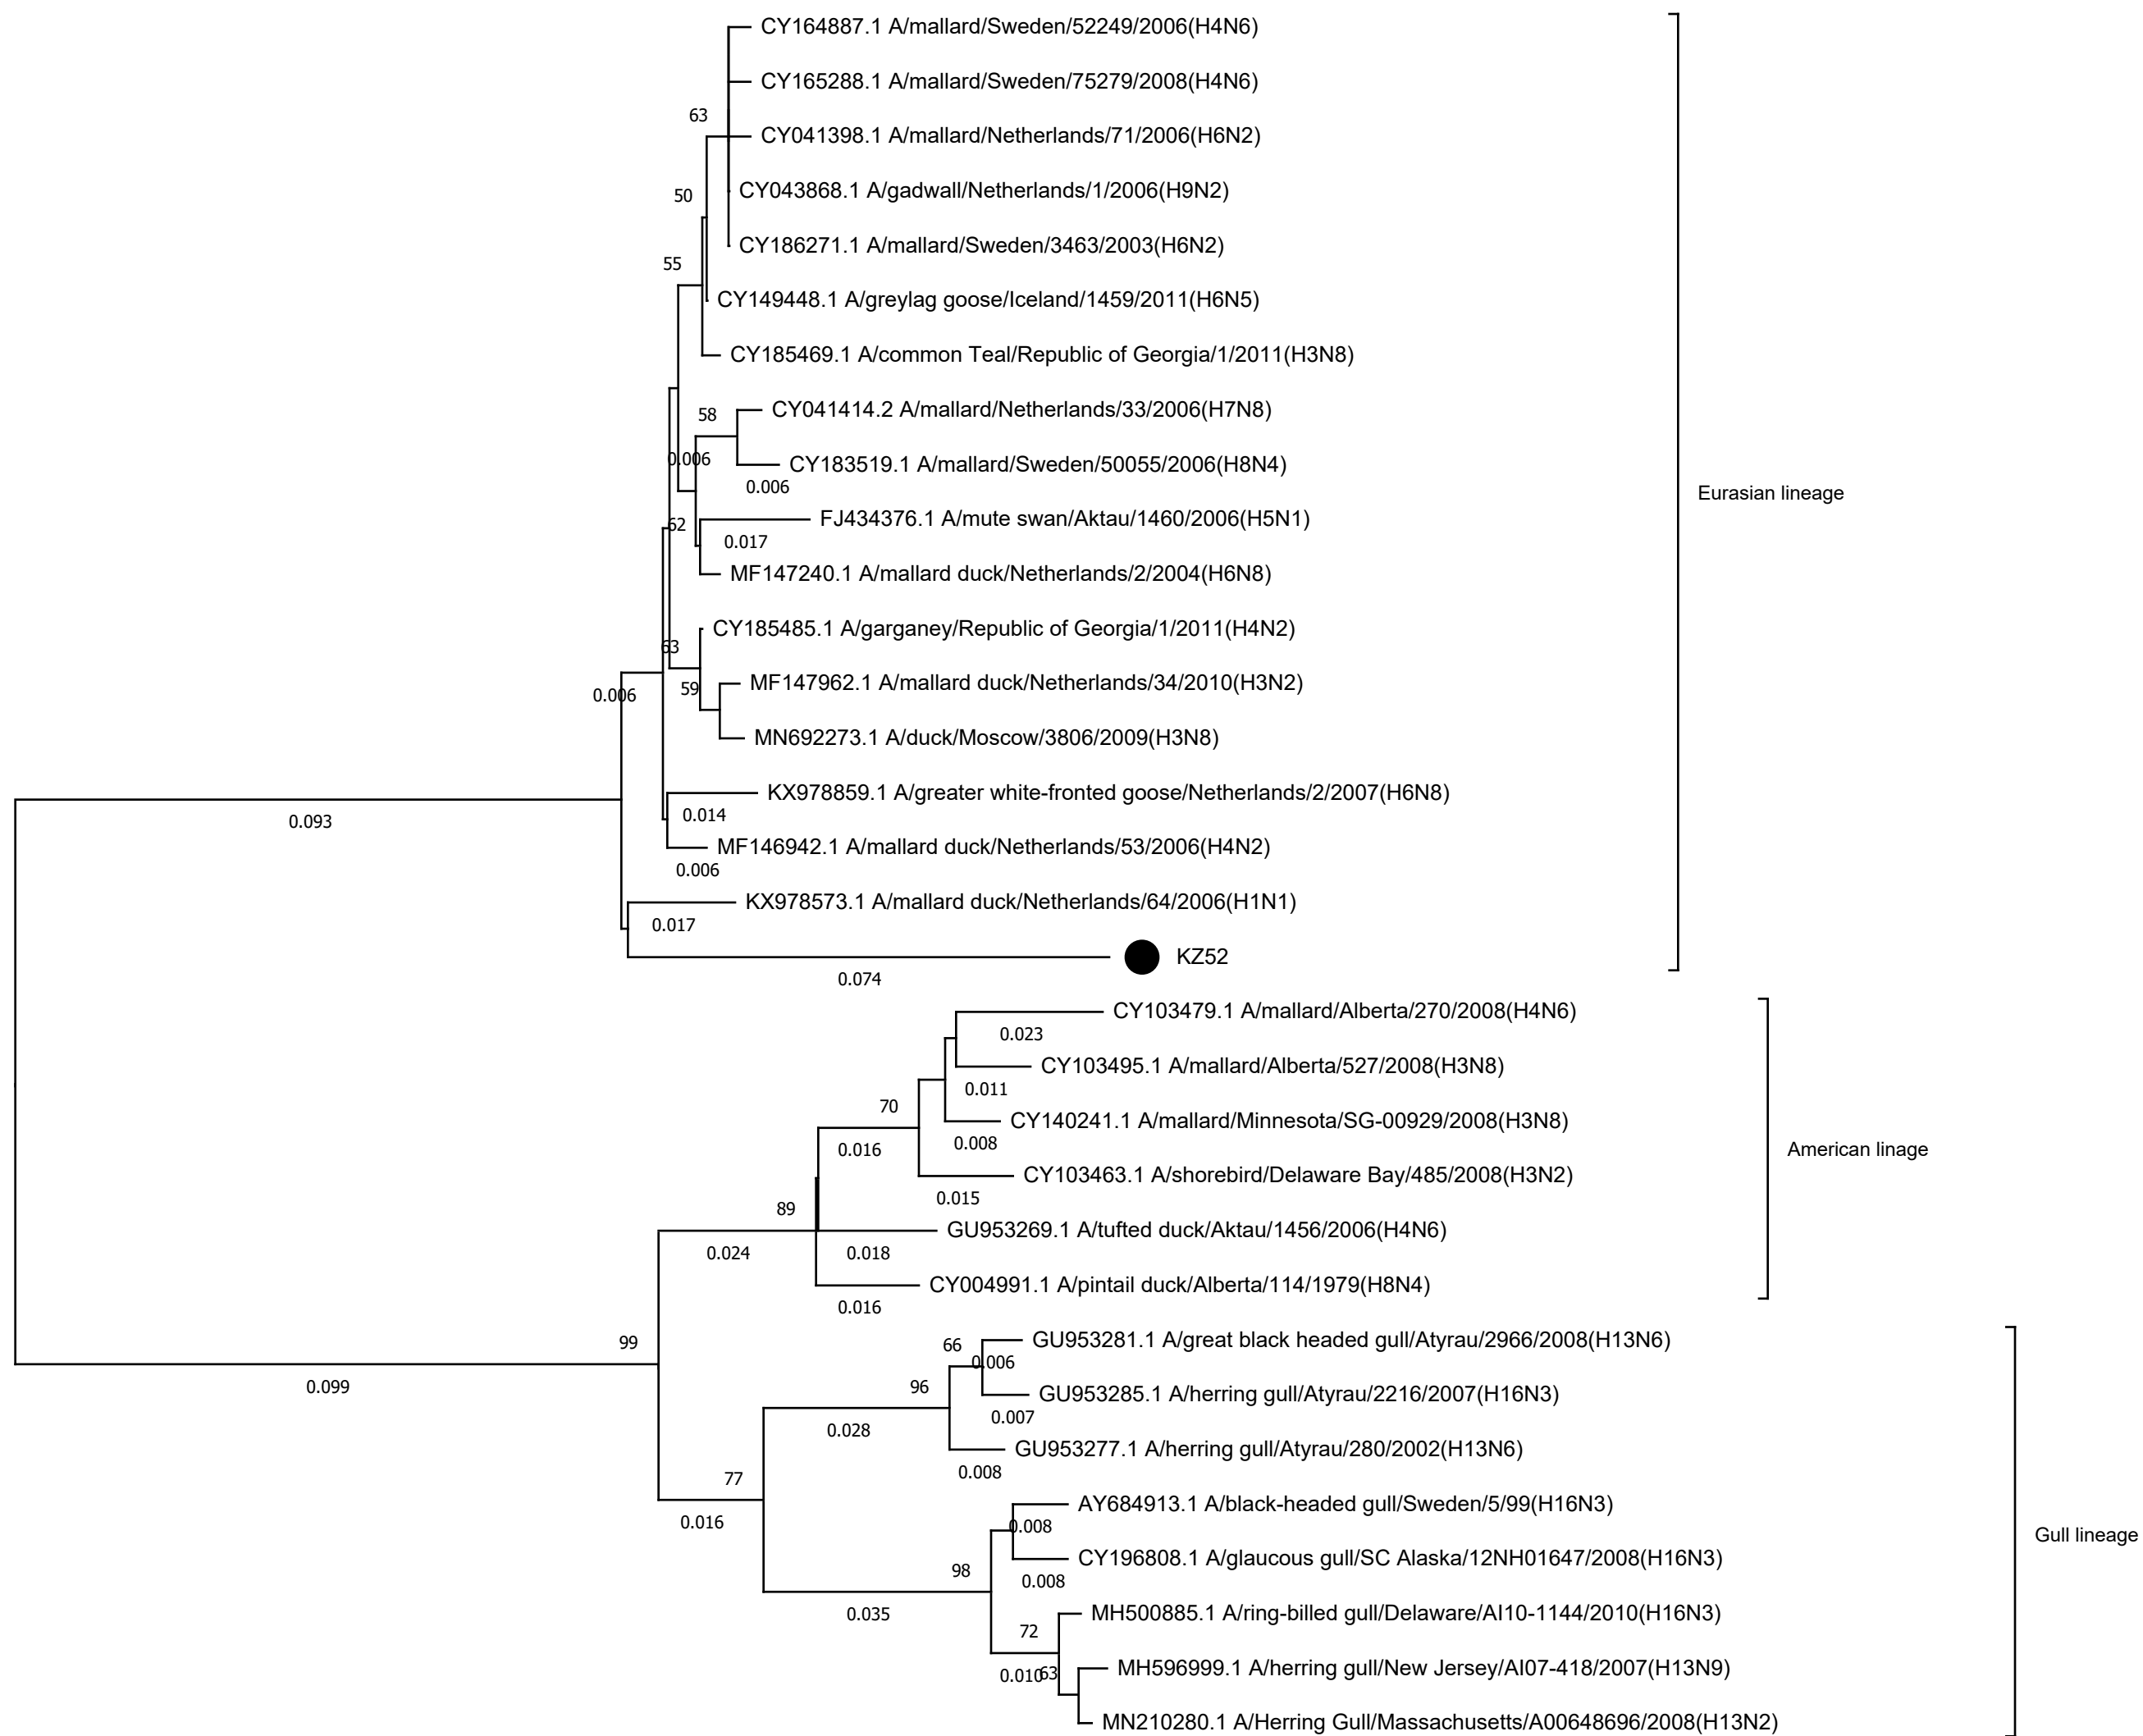

Supplement: TEMI_A_2225645_SM8149.pdf [file TEMI_A_2225645_SM8149.pdf]

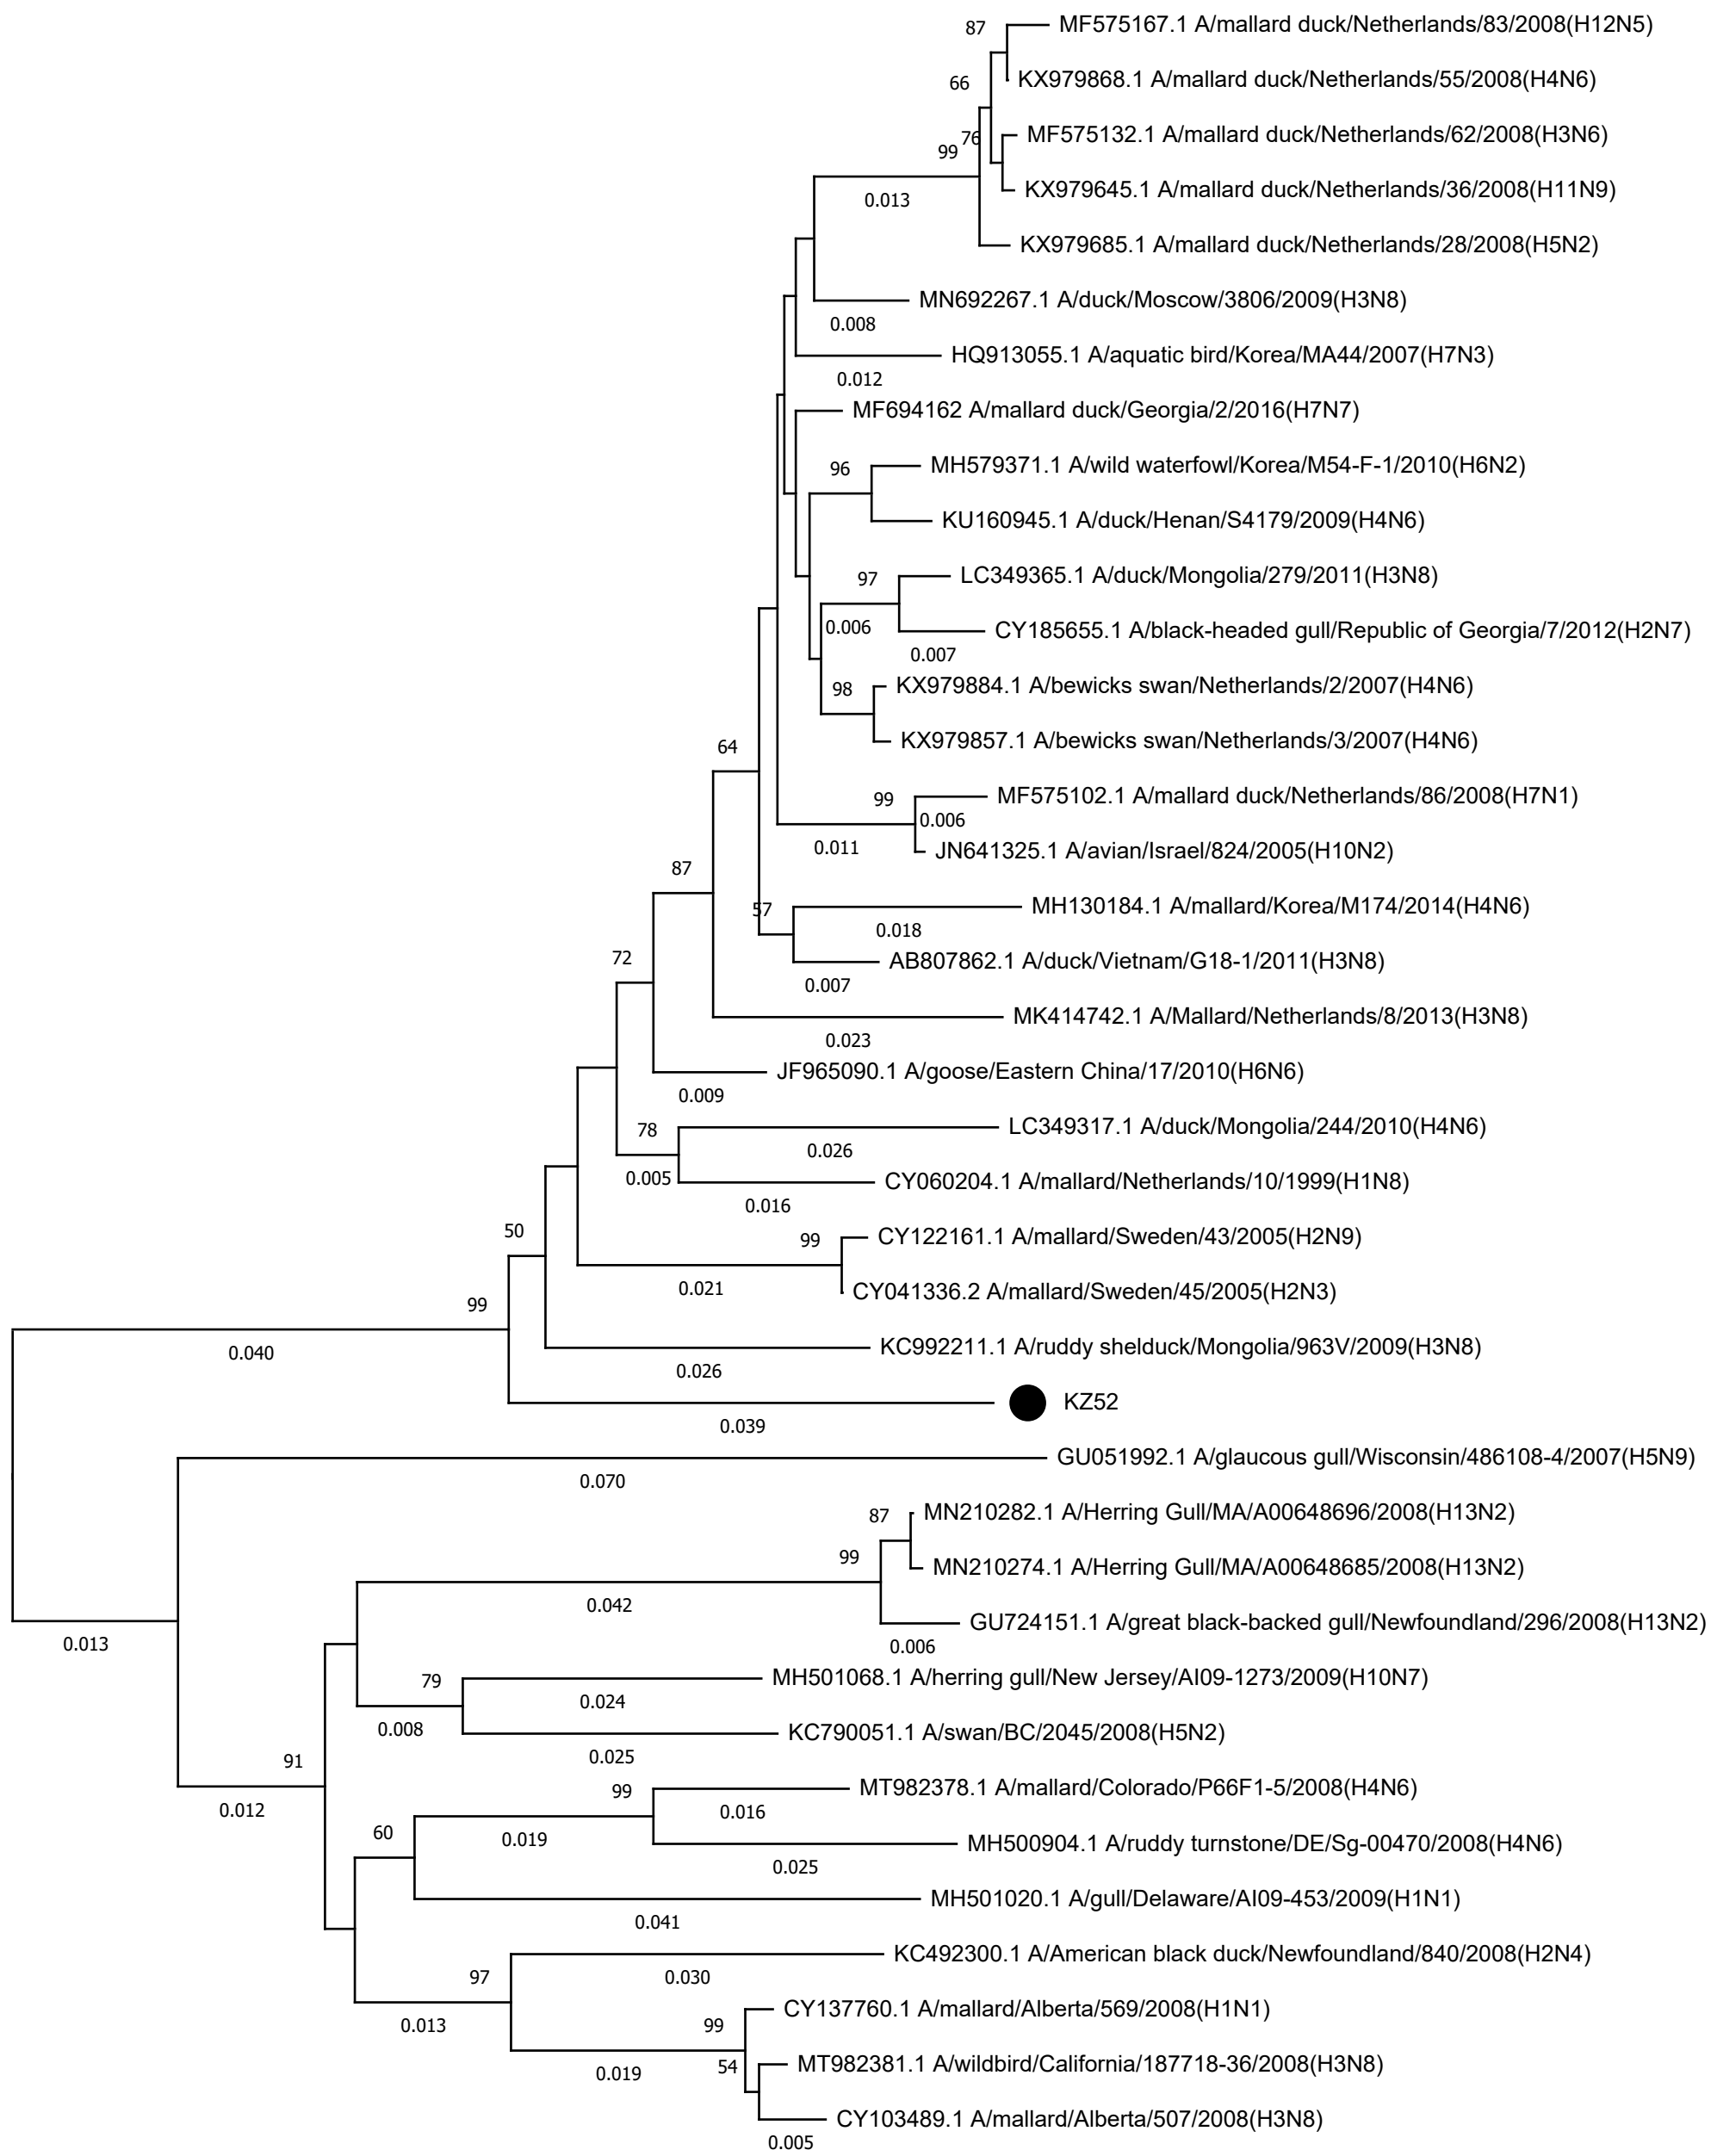

Eurasian lineage

American lineage

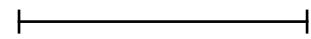

0.02

Supplement: TEMI_A_2225645_SM8150.pdf [file TEMI_A_2225645_SM8150.pdf]
